# Supplementary material for: Pregnancy-Associated Severe Sepsis: Contemporary State and Future Challenges
Source: Springer Nature journal article supplement (doi:10.1007/s40121-014-0037-7), 2014-09-08
Supplement: MOESM1 [file 9339642]

## **Search strategy for pregnancy-associated severe sepsis**

Limit of publication date: 1992 to MARCH 2014

1. Sepsis
2. Severe sepsis
3. Septic shock
4. Septicemia
5. Organ failure
6. Critical illness
7. Critical Care
8. Intensive care
9. Mortality
10. Pregnancy
11. Abortion
12. Delivery
13. Puerperium
14. Miscarriage
15. #1 OR #2 OR #3 OR #4
16. #10 OR #11 OR #12 OR #13 OR #14
17. #15 AND #16
18. #17 AND [#5 OR #6 OR #7 OR #8]
19. #17 AND #9
20. Limit #1- #19 to HUMANS, ENGLISH
