# Supplementary material for: Pregnancy-Associated Severe Sepsis: Contemporary State and Future Challenges
Source: Springer Nature journal article supplement (doi:10.1007/s40121-014-0037-7), 2014-09-08
Supplement: MOESM2 [file 9339642]

- Pregnancy is associated with increased risk of infectious complications and sepsis remains among the top causes of maternal death worldwide.
- Despite the voluminous data on the infectious complications of pregnancy, the contemporary understanding of pregnancy-associated severe sepsis (PASS) is limited.
- Available reports indicate that PASS is a rare complication, but its incidence appears to be rising over the past decade.
- The early clinical manifestations of PASS can overlap normal pregnancy-related changes, with the site of infection often not readily apparent, while the clinical course can be rapidly fatal, requiring heightened clinician vigilance.
- The case fatality of PASS appears lower than that reported in the general population with severe sepsis, while the long-term outcomes among survivors remain unknown.

This summary slide represents the opinions of the authors. No funding or sponsorship was received for this study or publication of this article. For a full list of acknowledgments and conflicts of interest for all authors of this article, please see the full text online. Copyright © The Author 2014. Creative Commons Attribution Noncommercial License (CC BY-NC).
